# Supplementary material for: Age-Period-Cohort Analysis of Stroke Mortality Attributable to High Sodium Intake in China and Japan: GBD Data 1990 to 2016
Source: PubMed Central journal article supplement — Stroke. 2019 Jun 14;50(7):1648–54. doi: 10.1161/STROKEAHA.118.024617 (PMC6594775; doi:10.1161/strokeaha.118.024617), 2019-06-14
Supplement: str-50-1648-s001.pdf [file str-50-1648-s001.pdf]

SUPPLEMENTAL MATERIAL

---

**Supplemental Table I. Wald Chi-Square tests for estimable functions in the APC model.**

| Null Hypothesis                     | China      |                 |            |                 | Japan      |                 |            |                 |
|-------------------------------------|------------|-----------------|------------|-----------------|------------|-----------------|------------|-----------------|
|                                     | Males      |                 | Females    |                 | Males      |                 | Females    |                 |
|                                     | Chi-Square | <i>P</i> -Value |
| <b>NetDrift = 0</b>                 | 1246.8     | <0.001          | 3075.20    | <0.001          | 922.00     | <0.001          | 754.1      | <0.001          |
| <b>All Period RR = 1</b>            | 1499.8     | <0.001          | 3706.50    | <0.001          | 1287.5     | <0.001          | 1017.2     | <0.001          |
| <b>All Cohort RR = 1</b>            | 4959.0     | <0.001          | 12991.00   | <0.001          | 9328.5     | <0.001          | 9888.2     | <0.001          |
| <b>All Local Drifts = Net Drift</b> | 39.6       | <0.001          | 51.4       | <0.001          | 116.4      | <0.001          | 300.7      | <0.001          |
